# Supplementary material
Source: Springer Nature journal article supplement (https://www.springermedizin.de/resource/supplementary/12899_2003_48_MOESM2_ESM.pdf/9514796)

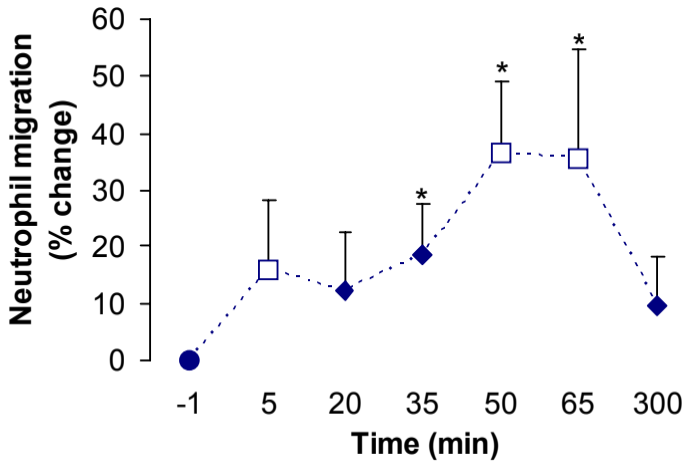

Supplement: MOESM2 [file 9514796]
